# Supplementary material for: A delayed fractionated dose RTS,S AS01 vaccine regimen mediates protection via improved T follicular helper and B cell responses
Source: eLife. 2020 Apr 29;9:e51889. doi: 10.7554/eLife.51889 (PMC7213985; doi:10.7554/eLife.51889)
Supplement: Figure 2—figure supplement 2—source data 1. — (A) Ag.non-pTfh (% of CD40L+ CD4 T cells). (B) IL-21+ Ag. Non-pTfh (% of Ag.non-pTfh). (C) ICOS+Ag.non-pTfh (% of Ag.non-pTfh). (D) Ki67+Ag.non-pTfh (% of Ag.non-pTfh). (E) Ag.non-pTfh (% of CD40L+ CD4 T cells) DFD vs STD. (F), IL-21+ Ag. Non-pTfh (% of Ag.non-pTfh) DFD vs STD. (G) ICOS+Ag.non-pTfh (% of Ag.non-pTfh) DFD vs. STD. (H) Ki67+Ag.non-pTfh (% of Ag.non-pTfh) DFD vs. STD. [file elife-51889-fig2-figsupp2-data1.xlsx]

## Sheet: Fig A
Fig A: Ag.non-pTfh (% of CD40L+ CD4 T cells)
	P		NP
	Mean	SEM	Mean	SEM
T0	31.58	2.528	34.97	2.698
T1	32.73	2.102	33.07	2.398
T2	31.41	2.235	34.78	1.622
T3	42.56	2.443	37.75	2.232
T4	38.01	2.461	35.5	1.514
T5	37.22	2.588	32.63	2.473
T6	35.71	2.632	34.81	2.709
T7	40.82	2.584	37.55	2.738

## Sheet: Fig B
Fig B: IL-21+ Ag. Non-pTfh (% of Ag.non-pTfh)
	P		NP
	Mean	SEM	Mean	SEM
T0	0.8684	0.1071	1.102	0.3726
T1	1.845	0.2431	1.413	0.316
T2	1.673	0.2558	1.261	0.2379
T3	1.933	0.2515	1.531	0.314
T4	1.825	0.3075	2.122	0.738
T5	1.818	0.262	2.144	0.8437
T6	1.699	0.2577	1.308	0.32
T7	1.533	0.2323	1.607	0.6314

## Sheet: FigC
Fig C: ICOS+Ag.non-pTfh (% of Ag.non-pTfh)
	P		NP
	Mean	SEM	Mean	SEM
T0	18.49	1.286	21.53	2.177
T1	22.23	1.734	25.89	2.584
T2	21.46	1.526	21.73	1.194
T3	28.2	2.206	24.73	3.281
T4	23.53	1.884	21.21	1.4
T5	23.23	1.914	24.98	3.407
T6	24.37	1.923	21.92	3.224
T7	21	1.846	19.16	2.344

## Sheet: Fig D
Fig D: Ki67+Ag.non-pTfh (% of Ag.non-pTfh)
	P		NP
	Mean	SEM	Mean	SEM
T0	5.342	0.8742	7.916	3.114
T1	8.441	1.878	6.427	1.484
T2	5.953	0.7741	5.523	2.208
T3	10.04	3.548	8.938	4.043
T4	8.197	3.147	3.983	1.518
T5	6.859	1.989	2.577	0.5793
T6	6.941	2.982	4.793	2.824
T7	6.35	2.925	4.211	1.194

## Sheet: FigE
Fig E: Ag.non-pTfh (% of CD40L+ CD4 T cells) DFD vs STD
DFD: T5	STD: T5	DFD: T6	STD: T6	DFD: T7	STD: T7
28.8	20.5	23.8	31.3	29.8	43.2
63.4	9.28	74.9	7.3	77.5	13.2
25.3	34.5	20.7	38.8	25.5	33.1
45.2	30.6	39.1	29.7	39.5	39.8
22.3	18.8	20	34.6	23.5	35.3
	58.1		63.6		66
42.8	23.7	50.6	29.3	46.7	35.4
21.4	31.7	23.4	33.7	29.6	33.2
39.5	31	35.4	12.9	42.5	35.6
32.5	41.6	27.9	52.9	40	42.8
41.4		24.9		34.5
36.4		43.7		42.3
47	37.4	46	31.2	37.6	36.5
23.8	34.3	26.1	31.9	28.3	46.5
56.1		54.8	36.5	56.3	37.3
83.1	21.7	63	31.2	73	33.2
36.4	20.6	23.8	26.5		19.1
37.1	32.4	43.4	41.1	51.7	40.6
40.9		24.1
38.6		29.3		33.5
11.3		14.3		25.8
51.8		47.6		22.9
42		49		42.6
31		34.2		38.7
43.9		40.2		61.9
60.8				65.6
32.6		24.4		34.8
44.3		54.9		49.8
34.4		34.2		33.2

## Sheet: FigF
Fig F: IL-21+ Ag. Non-pTfh (% of Ag.non-pTfh) DFD vs STD
DFD: T5	STD: T5	DFD: T6	STD: T6	DFD: T7	STD: T7
0.5	1.4	0.7	1.31	0.56	1.77
1.5	1.09	1.85	1.31	1.37	1.66
0.92	2.02	0.04	1.69	0.651	1.43
0.57	0.47	0.21	0.45	0.86	0.89
	2.08	2.78	1.4	2.45	1.1
	0.78		0.8		0.1
0.39	1.7	0.79	1.9	0.89	1.05
1.6	0.73	3.1	0.3	1.71	0.5
0.76	0.641	0.52	0.611	0.45	0.973
0.81	1	0.6	0.4	0.2	0.5
1.77		1.2		0.985
2.7		3.6		3.27
1.4	0.345	0.82	0.691	0.9	0.385
0.82	0.6	0.61	0.67	0.19	0.05
6.58		4.95		5.66	1.2
5.4	0.84	3.7	0.73	4.9	1.9
0.33	3.14	0	3.05		2.24
3.71	0.6	2.15	0.9	1.68	0.6
1.5		0.61
3.22		2.82		1.25
2.44		4.81		2.05
1.36		1.83		0.86
1.8		2		2.1
5.68		6.01		4.55
1.5		1.9		2.24
2.64				0.83
6.68		2.4		6.94
0.56		0.38		0.48
0.53		0.79		0.87
6		2.16		1.4

## Sheet: FigG
Fig G: ICOS+Ag.non-pTfh (% of Ag.non-pTfh) DFD vs. STD
DFD: T5	STD: T5	DFD: T6	STD: T6	DFD: T7	STD: T7
13.5	12	13.7	14.8	11.1	11.3
12.2	18.1	14.3	22.2	7.98	16.1
25	11.5	14.9	24.7	14.1	32.9
35.7	47.7	51.8	48.2	40.3	30.6
	17.2	35.1	21.1	32.6	23.3
	14.3		16.2		12.7
20.5	32.8	22.4	33.4	24.7	21.1
49.9	23.8	52	26.6	50.6	20.8
23.3	15.1	32.4	32.1	22.5	15.8
25.2	19.7	20.2	26.4	22.3	20.3
14.2		15		10
16.9		12.6		11.1
26.1	8.21	20.6	18.2	18.3	4.23
12.7	17.1	15.3	19.8	15.3	19.6
11.4		8.32		10.7	21.4
5.91	30	26.6	13.2	45.6	11.1
16.7	28.1	25	17.3		21.3
30.7	23.3	27.1	39.1	23.8	32.9
43.3		19.9
35.3		34.9		33.2
29.2		30.8		18.1
27		16.5		15.3
27		16.5		15.3
40.8		30.3		24
23.7		6.72		9.16
11.5				12
34.1	25.9	32.3	22.9	24.5	19.7
14.1	17.6	14.6	13.5	10.6	22.2
20.8		17		19.3
45.3	31.4	44.7	36.9	43.6	35.9

## Sheet: Fig H
Fig H: Ki67+Ag.non-pTfh (% of Ag.non-pTfh) DFD vs STD
DFD: T5	STD: T5	DFD: T6	STD: T6	DFD: T7	STD: T7
4.57	4.76	5.26	0.687	7.92	0.441
0.899	4.05	0.159	4.43	0.266	6.93
10	0.2	1.41	4.12	0.601	6.29
7.14	1.69	0.796	1.25	1.86	1.17
3.04	1.03	3.11	5.28	1.01	4.67
	22		17.7		10.7
0.476	4.55	0.773	1.4	0.485	1.45
1.21	6.3	2.65	6.9	2.01	2.08
1.55	1.45	6.34	3.2	5.94	1.6
6.69	6.03	5.5	2.95	3.59	4.95
3.73		3		7.06
7.31		0.575		0.57
1	1.03	0.858	2	1.06	1.7
1.36	2.82	5.3	1.7	4.69	8.11
0.63		0.107	4.32	0.225	6.45
9.9	1.99	8.1	0.35	7.5	0.298
8.33	2.62	0	2.06		5.12
4.14	6.77	3.33	9.9	2.33	11.9
6.13		4.34
4.44		4.16		3.75
0.763		1.92		0.604
2.01		0.268		2.93
3.48		3.01		4.62
6.71		14.6		5.54
2.06		2.52		1.68
0.422				3.02
2.76		4.29		4.62
2.18		0.243		0.722
