# Supplementary material for: A delayed fractionated dose RTS,S AS01 vaccine regimen mediates protection via improved T follicular helper and B cell responses
Source: eLife. 2020 Apr 29;9:e51889. doi: 10.7554/eLife.51889 (PMC7213985; doi:10.7554/eLife.51889)
Supplement: Figure 2—source data 1. [file elife-51889-fig2-data1.xlsx]

## Sheet: Fig 2 D
Fig 2 Surce data 1: Fig 2D: Total pTfh frequencies
	P		NP
	Mean	SEM	Mean	SEM
T0	22.04	0.961	18.58	1.685
T1	26.8	1.148	18.89	1.622
T2	27.82	1.335	19.8	1.726
T3	28.93	1.846	19.26	1.88
T4	29.85	1.76	21.16	1.66
T5	29.49	1.937	21.09	1.99
T6	29.21	1.898	20.36	1.787
T7	27.81	2.001	19.28	1.577
