# Supplementary material for: A delayed fractionated dose RTS,S AS01 vaccine regimen mediates protection via improved T follicular helper and B cell responses
Source: eLife. 2020 Apr 29;9:e51889. doi: 10.7554/eLife.51889 (PMC7213985; doi:10.7554/eLife.51889)
Supplement: Figure 2—source data 2. [file elife-51889-fig2-data2.xlsx]

## Sheet: Fig 2 E
Fig 2 Surce data 2: Fig 2E: Frequencies of CSP specific CD4 T cells
	P		NP
	Mean	SEM	Mean	SEM
T0	1.214	0.1919	2.375	1.278
T1	1.259	0.3044	0.8595	0.2391
T2	1.586	0.4036	1.58	0.6451
T3	2.241	0.5268	1.606	0.6394
T4	2.395	0.7095	1.345	0.2823
T5	1.985	0.3735	1.241	0.2788
T6	2.567	0.7518	2.029	0.7338
T7	2.066	0.4938	1.572	0.4761
