# Supplementary material for: A delayed fractionated dose RTS,S AS01 vaccine regimen mediates protection via improved T follicular helper and B cell responses
Source: eLife. 2020 Apr 29;9:e51889. doi: 10.7554/eLife.51889 (PMC7213985; doi:10.7554/eLife.51889)
Supplement: Figure 2—source data 3. [file elife-51889-fig2-data3.xlsx]

## Sheet: Fig 2 F
Fig 2 Surce data 3: Fig 2F: Frequencies of CSP specific pTfh cells
	P		NP
	Mean	SEM	Mean	SEM
T0	16.01	1.246	14.71	1.348
T1	23.86	1.77	19.01	1.929
T2	26.43	2.125	16.45	1.221
T3	23.96	2.074	19.32	1.439
T4	25.12	2.139	20.32	2.698
T5	22.78	1.909	20.18	2.187
T6	24.03	2.017	18.77	2.113
T7	24.16	1.966	17.71	1.486
