# Supplementary material for: A delayed fractionated dose RTS,S AS01 vaccine regimen mediates protection via improved T follicular helper and B cell responses
Source: eLife. 2020 Apr 29;9:e51889. doi: 10.7554/eLife.51889 (PMC7213985; doi:10.7554/eLife.51889)
Supplement: Figure 2—source data 4. [file elife-51889-fig2-data4.xlsx]

## Sheet: Fig 2 G
Fig 2 Surce data 4: Fig 2G: Frequencies of total pTfh: DFD vs. STD
DFD: T5	STD: T5	DFD: T6	STD: T6	DFD: T7	STD: T7
32.3	30.9	35	22	31.4	22.2
19.5	36	19.7	35.3	20.9	31.7
34.9	30.7	38.1	29	31.3	30.1
18.7	17.4	27.5	14	26.9	15.5
	28.9	35.2	25.7	36.7	27.1
	29.1		29.7		25.1
28.5	40.2	33.9	40.7	26.2	39.5
27.4	32.5	23.9	32.2	24.8	27.6
20.7	74.3	20.8	74.9	20.3	80.2
34.2	16.6	34.7	21.3	28.5	20.4
17.5		22.3		15.1
20.3	26.8	17.6	25.9	17.4	24.2
34.7	19.1	24.8	18.6	32.4	18.1
39		35.4		35.4	16.9
25.8	10.4	30.4	10.8	25.7	10.5
19.3	23.9	21.4	27.5	19.1	26.8
29.4	21.1	30.8	19.9		21.6
26.9		24.2		18.3
26.9		25.6		24.7
22.3		25.7		26.1
55.8		49.5		46.5
33.9		31.2		34.5
23.4		21.7		21.6
27.5		21.3		22.9
21.4		17.7		18.5
25.8				21
28.9		25.4		23
15.6		16.2		13.9
17.9		17.3		16.6
26.1		21.6		21.2
