# Supplementary material for: A delayed fractionated dose RTS,S AS01 vaccine regimen mediates protection via improved T follicular helper and B cell responses
Source: eLife. 2020 Apr 29;9:e51889. doi: 10.7554/eLife.51889 (PMC7213985; doi:10.7554/eLife.51889)
Supplement: Figure 2—source data 5. [file elife-51889-fig2-data5.xlsx]

## Sheet: Fig 2 H
Fig 2 Surce data 5: Fig 2H: Frequencies of CSP specific CD4 T cells: DFD vs. STD
DFD: T5	STD: T5	DFD: T6	STD: T6	DFD: T7	STD: T7
2.9	0.77	3.88	8.46	2.11	4.14
2.53	0.497	3.4	0.327	2.71	0.221
0.744	0.899	1.03	1.19	1.18	0.55
0.805	8.15	0.553	19.7	0.766	6.41
0.647	0.803	0.727	0.265	0.483	0.297
	1.23		1.82		5.88
3.26	0.182	0.598	0.518	0.881	0.471
1.59	0.423	1.39	0.304	0.549	0.26
2.49	2.63	1.03	2.7	0.241	2.54
1.64	0.845	0.829	0.412	0.961	0.602
1.14		1.23		1.03
0.5	2.04	0.53	1.16	0.887	2.74
0.545	1.62	0.667	2.38	0.319	0.602
5.18		1.63	0.282	1.98	0.47
9.64	2.39	9.07	4.43	10.9	4.97
5.49	2.18	15.9	2.87	11.9	1.75
1.26	0.152	2.67	0.197		0.542
0.954		1.27		2.52
0.293		0.415
0.585		0.623		0.799
2		0.938		1.93
0.624		0.761		0.514
0.529		0.45		0.53
0.629		1.43		1.28
2.38		0.568		1.34
4.68				1.01
0.982		0.664		1.06
0.882		7.33		2.73
0.365		0.498		0.32
0.56		0.481		0.537
