# Supplementary material for: A delayed fractionated dose RTS,S AS01 vaccine regimen mediates protection via improved T follicular helper and B cell responses
Source: eLife. 2020 Apr 29;9:e51889. doi: 10.7554/eLife.51889 (PMC7213985; doi:10.7554/eLife.51889)
Supplement: Figure 2—source data 6. [file elife-51889-fig2-data6.xlsx]

## Sheet: Fig 2 I
Fig 2 Surce data 6: Fig 2I: Frequencies of CSP specific pTfh cells: DFD vs. STD
DFD: T5	STD: T5	DFD: T6	STD: T6	DFD: T7	STD: T7
20.1	7.6	28	7.71	20.1	9.36
27.8	15.1	16.5	13.2	16.1	19.5
42.4	27.3	48	36.2	36.5	36.4
32.3	8.51	32.2	5.47	28.6	7.75
22.3	12.6	28	17.4	22.1	15.9
	40.3		32.6		31.4
30.6	23.4	26.9	30.4	27.5	26.5
15.4	43.1	15.5	44.1	14.3	47.2
19.2	28.9	20.8	17.2	26.5	37.5
52.4	13.7	55.2	13.3	39.2	12.4
19		17.1		15.9
12.4	31.1	20.8	29.4	13.9	21
12.3	23.1	14.3	23.7	16.1	22.3
41.5		35.6		37.1	11.3
18.7	17.4	20.9	13.2	20.6	16.6
11.7	17.3	26.8	19.1	24.3	16.9
30.3	14.4	29.8	17.9		24.8
29.8		26.8		17.5
13		14.4
21.5		27.2		27.6
29		39.7		36
17.7		19.4		53.8
9.04		9.21		13.3
17.6		13.7		13.9
10.4		12.5		13.9
20.2				18.7
24.2		23.1		20.3
8.8		8.8		12.3
20.5		13.2		11.9
24.8		20.5		19.7
