# Supplementary material for: A delayed fractionated dose RTS,S AS01 vaccine regimen mediates protection via improved T follicular helper and B cell responses
Source: eLife. 2020 Apr 29;9:e51889. doi: 10.7554/eLife.51889 (PMC7213985; doi:10.7554/eLife.51889)
Supplement: Figure 3—source data 1. [file elife-51889-fig3-data1.xlsx]

## Sheet: Fig  3D
Fig 3 Source data file 1: Fig 3D: Frequencies of IL-21+ Ag.pTfh
	P		NP
	Mean	SEM	Mean	SEM
T0	1.655	0.2237	1.146	0.372
T1	3.871	0.7626	1.737	0.5643
T2	3.97	0.9059	1.612	0.4348
T3	4.14	0.4675	1.79	0.5575
T4	4.071	0.9932	1.233	0.4237
T5	4.116	0.5961	1.696	0.4731
T6	3.772	0.6722	1.42	0.5549
T7	3.784	0.607	1.478	0.3016
