# Supplementary material for: A delayed fractionated dose RTS,S AS01 vaccine regimen mediates protection via improved T follicular helper and B cell responses
Source: eLife. 2020 Apr 29;9:e51889. doi: 10.7554/eLife.51889 (PMC7213985; doi:10.7554/eLife.51889)
Supplement: Figure 3—source data 2. [file elife-51889-fig3-data2.xlsx]

## Sheet: Fig 3 E
Fig 3 Source data file 2:Fig 3E: Frequencies of ICOS+Ag.pTfh
	P		NP
	Mean	SEM	Mean	SEM
T0	24.82	2.238	30.43	3.634
T1	35.89	2.917	30.65	4.482
T2	33.43	2.637	30.68	3.095
T3	39.88	2.53	30.83	4.717
T4	38.19	3.265	26.72	2.865
T5	38.2	2.497	31.69	5.298
T6	39.61	3.099	28.77	3.007
T7	39.99	2.838	23.1	2.868
