# Supplementary material for: A delayed fractionated dose RTS,S AS01 vaccine regimen mediates protection via improved T follicular helper and B cell responses
Source: eLife. 2020 Apr 29;9:e51889. doi: 10.7554/eLife.51889 (PMC7213985; doi:10.7554/eLife.51889)
Supplement: Figure 3—source data 3. [file elife-51889-fig3-data3.xlsx]

## Sheet: Fig 3 F
Fig 3 Source data file 3:Fig 3F: Frequencies of Ki67+Ag.pTfh
	P		NP
	Mean	SEM	Mean	SEM
T0	2.854	0.6019	4.166	1.47
T1	5.404	1.714	3.448	0.7976
T2	7.532	0.9335	3.922	1.916
T3	8.412	3.584	5.022	1.996
T4	5.707	2.377	3.196	1.45
T5	5.383	1.718	2.537	1.609
T6	6.179	3.032	3.78	2.119
T7	5.515	2.962	2.797	1.051
