# Supplementary material for: A delayed fractionated dose RTS,S AS01 vaccine regimen mediates protection via improved T follicular helper and B cell responses
Source: eLife. 2020 Apr 29;9:e51889. doi: 10.7554/eLife.51889 (PMC7213985; doi:10.7554/eLife.51889)
Supplement: Figure 3—source data 4. [file elife-51889-fig3-data4.xlsx]

## Sheet: Fig 3 G
Fig 3G: Frequencies of IL-21+Ag.pTfh: DFD vs. STD
DFD: T5	STD: T5	DFD: T6	STD: T6	DFD: T7	STD: T7
2.2	10.4	1.86	7.14	2.4	4.62
6.53	0	5.97	0.214	5.99	0
4.23	0.426	3.53	1.63	3.969	0.26
10	5.35	1.55	5.23	3.36	2.86
	0.342	5.11	2.83	5.06	1.98
	0.935		1.06		1.56
3.44	3.81	3.09	1.59	3.56	2.13
3.85	1.47	3.89	1.44	3.86	1.22
2.64	0.0657	4.1	0.0415	16.3	0.163
1.93	9.63	2.19	7.73	0.552	4.4
0.465		0.218		0.357
12.4	2.24	21.1	1.47	7.83	0.93
8.9	2.99	9.1	0.763	9.45	0.741
0.836		0.228		2.71	0.94
6.51	0.13	5.24	0.15	7.15	0.9
4	0.462	3.7	1.23	4.3	1.14
3.8	1.39	3.9	1.74		2.25
1.39		0.79		1.43
4.82		1.28
3.68		3.41		2.21
1.08		0.693		2.16
2.94		1.97		3.43
7.6		6		7.41
2.74		2.31		0.552
10.1		8.11		10.2
1.42				1.45
4.35		5.6		3.43
0.392		0.2		0.79
2.47		1.19		0.97
0.84		0.435		2.69
