# Supplementary material for: A delayed fractionated dose RTS,S AS01 vaccine regimen mediates protection via improved T follicular helper and B cell responses
Source: eLife. 2020 Apr 29;9:e51889. doi: 10.7554/eLife.51889 (PMC7213985; doi:10.7554/eLife.51889)
Supplement: Figure 3—source data 5. [file elife-51889-fig3-data5.xlsx]

## Sheet: Fig 3 H
Fig 3 Source data file 5: Fig 3H: Frequencies of ICOS+Ag.pTfh: DFD vs. STD
DFD: T5	STD: T5	DFD: T6	STD: T6	DFD: T7	STD: T7
37.3	45	50.9	20.6	41.9	19
29.1	15	23.2	9.83	22.3	8.63
38.8	31.1	37.5	33.7	50	36.6
50	75	79.3	66	70.9	59.9
	26	55.6	36	48	37.1
	36.4		45.1		43.9
41.2	41.7	44.3	44.2	46.3	30
67.1	32.4	74.4	31.1	79.2	23.7
36.4	17.3	50	11.7	42.8	21.3
48.6	26.7	26.5	53.6	32.3	38.9
35.6		19.6		20.7
20.2	6.58	21.7	27	31.3	7.88
26.7	17.5	31	18.8	35.3	17.6
		38.6		49.3	20
26.4	36.7	20.9	28	27.1	34
17.7	30.3	42.8	31.5	70	28.1
	33.8	63.6	32.1		29
39.1		37.1		36.8
47		26.1
54.3		59		58.1
40.9		58.8		36.6
56.9		56.6		62.2
42.6		14		46.9
54.7		41.9		37.3
42		21.6		23.8
23.1				31.6
60.2		44.2		32.7
30.3		16.7		17.4
22.2		21.9		13.1
47.6		38.7		31.2
