# Supplementary material for: A delayed fractionated dose RTS,S AS01 vaccine regimen mediates protection via improved T follicular helper and B cell responses
Source: eLife. 2020 Apr 29;9:e51889. doi: 10.7554/eLife.51889 (PMC7213985; doi:10.7554/eLife.51889)
Supplement: Figure 3—source data 6. [file elife-51889-fig3-data6.xlsx]

## Sheet: Fig 3 I
Fig 3 Source data file 6: Fig 3I: Frequencies of Ki67+Ag.pTfh: DFD vs. STD
DFD: T5	STD: T5	DFD: T6	STD: T6	DFD: T7	STD: T7
4.39	9.91	7.36	2.34	7.76	1.29
0.373	1.36	0.181	1.18	0.214	3.15
2.99	28.3	0.487	2.33	0.176	1.04
0	2.02	0.774	2.26	1.98	1.82
1.34	0.684	1.69	2.43	1.14	3.47
	19.4		33.2		18.8
0.156	1.24	0	1.07	0.548	1.83
1.11	2.32	1.45	1.91	3.77	0.489
1.68		3.63		7.72
2.26	2.42	2	2.4	1.86	2.44
2.56		2.18		2.5
7.87	1.8	1.81	1.6	0	1.6
1.9	0.599	3.45	1.15	1.99	3.7
0.724		1.83	2.94	1.43	5.66
1.03	0.355	0.28	0.331	0.284	0.356
51.9	0.726	97.7	1.41	95.3	1.75
0	15.3	0	22.1		11
2.24		1.82		1.34
4.82		2.14
3.68		1.97		2.47
0.597		0.693		0.433
6.86		1.97		0.935
8.82		4		4.94
4.56		9.25		3.04
2.9		8.11		1.36
0.604				0.966
2.17		6.53		1.98
0.93		0.271		0.654
0.391		0.598		0.496
0.56		0.87		0.769
