# Supplementary material for: A delayed fractionated dose RTS,S AS01 vaccine regimen mediates protection via improved T follicular helper and B cell responses
Source: eLife. 2020 Apr 29;9:e51889. doi: 10.7554/eLife.51889 (PMC7213985; doi:10.7554/eLife.51889)
Supplement: Figure 4—figure supplement 2—source data 1. — (B) CD80+ B cells (% of CD20+ B cells). (C) CD80+ B cells (% of CD20+ B cells). (D) CD80+ RM B cells (% of RM B cells). (E) CD80+ RM B cells (% of RM B cells). (F) CD80+ AM B cells (% of AM B cells). (G) CD80+ AM B cells (% of AM B cells). [file elife-51889-fig4-figsupp2-data1.xlsx]

## Sheet: Fig B
Fig B: CD80+ B cells (% of CD20+ B cells)
	P		NP
	Mean	SEM	Mean	SEM
T0	13.91	1.879	13.72	2.121
T1	16.03	1.829	16.12	2.318
T2	16.41	2.024	18.81	2.676
T3	16.88	2.211	14.95	2.51
T4	17.85	2.201	16.94	2.675
T5	17.27	1.918	16.79	2.253
T6	16.83	1.738	15.02	2.26
T7	17.3	2.096	14.79	2.559

## Sheet: Fig C
Fig C: CD80+ B cells (% of CD20+ B cells)
DFD: T5	STD: T5	DFD: T6	STD: T6	DFD: T7	STD: T7
6.73	20.6	6.28	22.8	6.23	23.1
33.4	5.05	38.9	4.26	43.5	3.31
13.3	14	11.4	16.5	9.56	13.8
7.82		8.96		7.95
9.44	12.9	12.4	12.4	18.3	12.5
11.8	12.7	10.5	13	13.7	10.8
24.3		24.3		24.7
12.6	15.6	13.9	12.7	20.8	10.9
21.6	6.86	25.3	8.57	24.4	5.34
	6.94		4.91		7.91
12.1	23.8	12.8	23.8	9.55	30.1
	22.9		22.3		17.9
	11.8		10.6		17.3
21.7		18.5		29.1
19.6	22.1	19.8	22.9	20.9	20.9
24	20	22.2	16.5		13.5
34.2	21.1	22.9	12.9	27	9.28
8.36		7.82		5.56
8.76		6.97		5.25
16.1		18.2		12.7
21.6		20.8		26.2
41.9		33.1		29.1
15.6	22.9	12.7	22.3	10.9	17.9
6.86	11.8	8.57	10.6	5.34	17.3
6.94		4.91		7.91
23.8	22.1	23.8	22.9	30.1	20.9
	20		16.5		13.5

## Sheet: Fig D
Fig D: CD80+ RM B cells (% of RM B cells)
	P		NP
	Mean	SEM	Mean	SEM
T0	26.14	2.958	25.47	3.515
T1	27.95	2.647	28.84	4.532
T2	27.15	3.136	28.68	4.013
T3	28.06	2.825	27.12	4.166
T4	30.33	2.837	28.06	4.001
T5	30.65	2.541	30.29	3.891
T6	29.66	2.545	27.53	3.88
T7	27.28	2.356	26.24	3.437

## Sheet: Fig E
Fig E: CD80+ RM B cells (% of RM B cells)
DFD: T5	STD: T5	DFD: T6	STD: T6	DFD: T7	STD: T7
19.8	29.1	19.4	26.7	14.4	31.2
40.2	12.5	44.7	9.82	46.3	9
47.1	27	42.6	27.1	42.4	25.1
30.8		40.6		36.2
18.4	28.2	16.5	26.8	20.6	25.5
16.4	13.1	14.4	14.9	16.1	11
33.2		30.1		31.9
22.5		29.7		26.2
45.8		48.1		47.2
28.2		30.6		23.7
40.5		35.2		39.6
36.6		32.4		32.1
62.3		62.1
42.4		34.1		38.6
12.4		14		11
31.4		17		17.1
24.3		26.2		20.4
31.9		33.6		32.3
41.4		35.2		29.6
34.1	25.9	32.3	22.9	24.5	19.7
14.1	17.6	14.6	13.5	10.6	22.2
20.8		17		19.3
45.3	31.4	44.7	36.9	43.6	35.9

## Sheet: Fig F
Fig F: CD80+ AM B cells (% of AM B cells)
	P		NP
	Mean	SEM	Mean	SEM
T0	40.56	3.819	42.3	4.777
T1	49.15	3.305	47.38	4.717
T2	48.45	3.472	50.56	4.204
T3	47.7	3.46	47.5	4.174
T4	49.22	3.727	46.57	4.651
T5	49.32	3.216	44.06	5.916
T6	50.72	3.15	42.85	5.052
T7	45.98	3.144	36.48	3.785

## Sheet: Fig G
FigG: CD80+ AM B cells (% of AM B cells)
DFD: T5	STD: T5	DFD: T6	STD: T6	DFD: T7	STD: T7
34.7	19.5	39.9	24.8	38.8	24.7
73	16	78.8	18.5	80.3	13.1
60	62.2	51.5	64.5	45.7	53.4
53.2	37.2	56.1	46.9	51.2	42.6
49	36.9	69	32.3	65.6	19.5
24.2	74.5	22.2	73.6	28.5	65.8
49.8		53.2	57.3	43	49.9
50.8	61.5	55.8	68.9	56.7	56.9
52.6	38.6	61.4	37.2	60.5	38.7
20.5	66.2	18.8	68.7	12.8	62.2
39.2		40.3		32.1
17		16		18.6
35.7		34.3		34.8
65.5		67		71.7
61.8		65.5		61
74.3		75.6
65.1		65.4		58.1
19.9		24		16.6
44.5		52		36.1
37.1		40.6		30.1
76.5		65.3		67.5
55.2		54.7		42.4
62.2		64.9		57.5
69.3		59.6		59.5
73.3				67.4
50.6	27.5	42.3	35.2	39.2	67.1
25.5	23.6	27.4	22.7	17.4	41.5
27.3		26.9	54.2	26.5	60
62.7	61.9	61.5	64.7	49.3	64.7
