# Supplementary material for: A delayed fractionated dose RTS,S AS01 vaccine regimen mediates protection via improved T follicular helper and B cell responses
Source: eLife. 2020 Apr 29;9:e51889. doi: 10.7554/eLife.51889 (PMC7213985; doi:10.7554/eLife.51889)
Supplement: Figure 4—figure supplement 3—source data 1. — (A) PF-CSP-specific Ki67+ aMBC (% of aMBC). (B) PF-16 specific Ki67+ aMBC (% of aMBC). [file elife-51889-fig4-figsupp3-data1.xlsx]

## Sheet: Fig A
Fig A: PF-CSP specific Ki67+ aMBC (% of aMBC)
DFD: T5	STD: T5	DFD: T6	STD: T6	DFD: T7	STD: T7
17.8	15.5	20.7	44.5	18.4	40
15.6	2.36	14.5	3.23	14	3.19
11.1	7.29	8.81	5.92	14.7	5.6
1.31	5.12	3.99	9.91	2.16	4.21
6.13	7.01	4.36	10.1	4.22	6.27
14.9	0.107	25	0.619	5.41	0.0809
15.1	2.75	14.5	2.6	12.6	2.68
	2.33		4.63		1.66
32.9	2.27	21.8	2.7	33.2	0
18.1	7.82	25.1	10.9	20.1	9.61
5.98		17.4		5.96
4.89	1.58	13.4	11.1	11.8	20
53.9	1.58	43.2	0.962	20	2.2
9.53		19.4	14.3	12.6	48.5
6.35	3.29	7.41	12.3	5.18	9.13
14.1	27.3	13	46.7	11	7.75
9.72	4.88	3.3	2.49		0.802
9.55		16.3		7.25
19.8		12.6		11
20.7		27.2		23.9
29.9		25.5		31.8
40.3		39.3		32.9
14.5		12.2		7.95
7.2		5.41		9.05
8.62		2.74		6.08
				11.1
15.8		9.54		9.9
5.91		5.18		7.26
9.06		16.3		12.4
2.63		7.41		3.38

## Sheet: Fig B
Fig B PF-16 specific Ki67+ aMBC (% of aMBC)
DFD: T5	STD: T5	DFD: T6	STD: T6	DFD: T7	STD: T7
19.5	24.3	17	43.1	19.3	30.3
11.2	8.28	15	5.41	14.1	3
9.84	9.94	7.55	7.29	5.83	9.91
1.81	6.31	5.58	11	1.97	6.8
5.22	13.9	5.43	27.8	7.68	12.6
17.6	2.43	38.7	0.092	8.75	0.113
14.3	3.42	14.8	3.03	13.3	3.28
	1.2		2.81		2
36.5	4.68	31.4	3.2	32.9	0
28.2	7.14	26.9	14.6	26.6	7.13
14.5		20.8		2.61
11.7	8.85	19.6	25.1	26.8	12.6
56.6	2.41	62.5	3.79	32.7	2.49
11		11.9	13.4	11.7	46.3
5.54	7.19	3.19	9.79	6.27	13.8
33.2	35.5	21.2	46.4	24.2	15.1
8.77	0.644	3.92	0.559		0.895
9.29		15.5		5.67
35.3		19.6		25.5
17.9		30.4		33.7
29.8		52.5		32.8
42.1		45.6		42.1
12.3		17.1		7.05
13.5		11.4		5.58
8.06		1.96		2.88
6.91				0
10.3		5.7		8.53
0		4.24		7.65
6.12		16.3		14
2.73		6.95
