# Supplementary material for: A delayed fractionated dose RTS,S AS01 vaccine regimen mediates protection via improved T follicular helper and B cell responses
Source: eLife. 2020 Apr 29;9:e51889. doi: 10.7554/eLife.51889 (PMC7213985; doi:10.7554/eLife.51889)
Supplement: Figure 4—figure supplement 4—source data 1. — (A) Frequencies of PF-CSP-specific SM B cells (% of memory B cells). (B) Frequencies of PF-CSP-specific sAM B cells (% of AM B cells). (C) Frequencies of PF-CSP-specific Ki67+ memory B cells (% of memory B cells). (D) Frequencies of PF-16-specific SM B cells (% of memory B cells). (E) Frequencies of PF-16-specific sAM B cells (% of AM B cells). (F) Frequencies of PF-16-specific Ki67+ memory B cells (% of memory B cells). [file elife-51889-fig4-figsupp4-data1.xlsx]

## Sheet: Fig A
Fig A: Frequencies of PF-CSP specific SM B cells (% of memory B cells)
	P		NP
	Mean	SEM	Mean	SEM
T0	26.8	3.243	25.94	3.115
T2	34.18	7.077	24.21	2.17
T4	31.32	3.852	25.51	2.371
T5	32.04	3.49	27.6	3.008
T6	32.08	4.609	24.92	2.314
T7	30.41	4.161	26.9	2.499

## Sheet: FigD
Fig D: Frequencies of PF-16 specific SM B cells (% of memory B cells)
	P		NP
	Mean	SEM	Mean	SEM
T0	24.42	3.669	23.99	2.24
T2	30.24	4.69	24.5	2.278
T4	33.54	3.52	28.89	2.54
T5	33.13	6.6	29.4	2.248
T6	36.16	4.056	29.76	2.395
T7	29.41	3.742	28.81	3.294

## Sheet: FigB
Fig B: Frequencies of PF-CSP specific sAM B cells (% of AM B cells)
	P		NP
	Mean	SEM	Mean	SEM
T0	29.36	3.516	29.37	2.526
T2	39.05	5.315	27.51	2.507
T4	36.68	4.306	31.98	2.535
T5	35.97	4.435	32.63	3.131
T6	40.64	5.053	32.42	2.523
T7	39.15	4.708	31.45	2.669

## Sheet: FigE
Fig E: Frequencies of PF-16 specific sAM B cells (% of AM B cells)
	P		NP
	Mean	SEM	Mean	SEM
T0	26.83	3.276	30.6	2.63
T2	38.05	3.84	28.3	2.27
T4	42.51	3.6	36.2	2.74
T5	36.88	7.03	35.14	2.27
T6	41.25	5.15	33.89	2.71
T7	34.41	4.54	34.53	3.32

## Sheet: FigC
Fig C: Frequencies of PF-CSP specific Ki67+ memory B cells (% of memory B cells)
	P		NP
	Mean	SEM	Mean	SEM
T0	30.89	3.703	27.71	6.738
T2	33.95	4.073	31.73	6.196
T4	36.06	4.447	32.11	6.859
T5	32.34	3.939	28.05	6.653
T6	38.29	4.157	31.15	7.587
T7	37.08	4.31	33.44	7.954

## Sheet: FigF
Fig F: Frequencies of PF-16 specific Ki67+ memory B cells (% of memory B cells)
	P		NP
	Mean	SEM	Mean	SEM
T0	29.05	3.78	24.31	5.583
T2	32.01	3.639	37.3	7.605
T4	39.52	4.34	40.55	7.22
T5	38.38	3.748	32.71	8.799
T6	43.18	4.369	37.67	7.636
T7	38.62	4.643	42.74	9.126
