# Supplementary material for: A delayed fractionated dose RTS,S AS01 vaccine regimen mediates protection via improved T follicular helper and B cell responses
Source: eLife. 2020 Apr 29;9:e51889. doi: 10.7554/eLife.51889 (PMC7213985; doi:10.7554/eLife.51889)
Supplement: Figure 4—source data 1. [file elife-51889-fig4-data1.xlsx]

## Sheet: Fig 4A
Fig 4 source data file 1:Fig 4A: PF-CSP specific SM B cells: DFD vs STD
DFD: T5	STD: T5	DFD: T6	STD: T6	DFD: T7	STD: T7
28.9	34.4	23.7	30.9	28.8	48.7
13.8	2.9	11.1	4.71	14.4	4.72
25.5	12.6	26.9	15.9	34.5	19.8
100	12.7	50	16.1	33.3	12.8
33.3	9.45	25.8	7.3	22.8	8.58
13.5	9.21	15.7	10.1	14	8.96
33.6	0	39.8	0	40	0
	8.32		5.44		6.89
38.8	6.88	36.8		48.1
50.6	28.5	50.2	25	48.1	27.2
30.3		28.9		24.5
24		25.3		45.6
22	23.7	23.3	22.9	22.3	21.9
34.3	25.7	23.8	25.3	24.6	28.2
36.8		38.7	21.7	43.8	24.4
41.2	20	35.2	23.4	33.4	30.9
41.1	40.5	39.9	47.8		46.8
41.4		35	5.93	46.3	7.17
26.5		15.3		19.5
31.6		38.9		38
29.3		47		41.8
21.5		21.2		13.7
26.5		22.7		31.6
43.6		14.1		26.6
23.5		17.5		27.4
29.6
48.3		53.8		47
38.4		37.8		46.9
34.4		40.9		29.8
25.3		41.3		21
