# Supplementary material for: A delayed fractionated dose RTS,S AS01 vaccine regimen mediates protection via improved T follicular helper and B cell responses
Source: eLife. 2020 Apr 29;9:e51889. doi: 10.7554/eLife.51889 (PMC7213985; doi:10.7554/eLife.51889)
Supplement: Figure 4—source data 2. [file elife-51889-fig4-data2.xlsx]

## Sheet: Fig 4D
Fig 4 source data file 2: Fig 4D: PF16 specific SM B cells: DFD vs STD
DFD: T5	STD: T5	DFD: T6	STD: T6	DFD: T7	STD: T7
28.4	36.6	23.2	29.7	28.3	50.1
12.7	41.1	10.1	3.66	11.8	1.79
21.3	24	26.3	21.4	26.5	22
	15.5	39.3	16.3	60	17.4
25.6	13	36.5	17.9	33	14.5
19.4	9.91	22.1	10.8	17.4	9.66
35.8		48.9		27.5	0
	7.42		4.98		6.48
65		45.9		63.1
50.6	25	53.5	28.4	56.3	30.5
36.3		33.3		7.02
30	26.8	33.5	42.2	62.7	28.8
21.7	31.1	29.8	31.2	21.1	30.1
27.1		30.3	41.4	48.7	23.4
44.1	57.1	41	22.7	42.7	19.6
42.4	58.8	49.2	56.5	34.3	32.4
32.1	9.09	40	11.6		9.95
48.5		33		51.2
31.2		18.1		37.2
30.5		49.4		50.5
36.4		51.4		42.2
26.5		27.7		21.4
20.7		17.6		27.3
32.8		25.8		12.3
15.4		33.3		15.9
33.8				0
46.4		48.3		49.4
0		33.8		38.1
33.1		41.4		32.9
35.8		32.5
