# Supplementary material for: A delayed fractionated dose RTS,S AS01 vaccine regimen mediates protection via improved T follicular helper and B cell responses
Source: eLife. 2020 Apr 29;9:e51889. doi: 10.7554/eLife.51889 (PMC7213985; doi:10.7554/eLife.51889)
Supplement: Figure 4—source data 3. [file elife-51889-fig4-data3.xlsx]

## Sheet: Fig 4B
Fig 4 source data file 3:Fig 4B: PF CSP switched activated memory B cells: DFD vs. STD
DFD: T5	STD: T5	DFD: T6	STD: T6	DFD: T7	STD: T7
22.8	40.9	38.9	55.4	14.7	60.6
49	2.95	38.8	6	34.7	5.77
39.1	19.2	42.9	21.1	42	21.8
100	9.3	56.5	21.8	55	14
38.5	37	25.8	27.2	24.4	31.2
19	20.7	19	16.8	17.4	16.8
40.5	0	38.9	0	32.9	0
	14		13.7		8.42
39	11.7	36.9	46.7	51.2	47.2
69.5	29.5	63.8	25.3	62.1	25.9
27.1		30.6		23.1
35.5		32.6		50.3
36.5	49.2	42.7	51.2	28.6	35.9
30.2	25	21.3	27.2	26.9	23.1
37.4		37.2	25.8	36.4	31.8
45.3	15.2	41	31.2	39.2	41.2
43.8	42.5	51.5	53.7		41.5
37.6	30.7	36.4	9.68	37.2	11.7
40.9		30.5		36.3
21.7		38.8		35.6
25.1		54.7		47
29.3		26		18.1
28.3		23.5		34.4
53.8		16.6		32.3
18.1		23.4		26.2
28.8
58.8		58.5		47.3
39.4		48.7		63.3
36.2		49.8		55.2
26.7		50.6		40.5
