# Supplementary material for: A delayed fractionated dose RTS,S AS01 vaccine regimen mediates protection via improved T follicular helper and B cell responses
Source: eLife. 2020 Apr 29;9:e51889. doi: 10.7554/eLife.51889 (PMC7213985; doi:10.7554/eLife.51889)
Supplement: Figure 4—source data 4. [file elife-51889-fig4-data4.xlsx]

## Sheet: Fig 4E
Fig 4 source data file 4:Fig4E: PF 16 specific switched activated memory B cells: DFD vs. STD
DFD: T5	STD: T5	DFD: T6	STD: T6	DFD: T7	STD: T7
29.4	45.9	31.8	49	28.7	58.7
45.9	42.7	46.3	1.59	37.7	7.69
32.5	31.8	24.5	23.1	31.4	28
	26.5	37.9	19.1	60	24.3
31.8	27.3	35.9	31.4	34.4	33.6
25	35.9	25.6	11.8	24.9	22.3
41.1	0	42.6	0	35.1	0
66.6	10.7		10.2	65.1	8.64
63.4	50.4	47.2	23.2	72.8	35.7
39.2	26.3	72.2	29.4	3.45	27.2
34.3		35.5		68.5
43.3		43.7		35.6
20.8	59	54	69.1	40.4	52.5
40.8	28.1	28.4	28.9	46.3	29.4
44.8		34.1	30.8	38.9	20.8
35.2	48	52.8	31.5		27.7
46.1	61.5	44.6	60.6	49.7	30.9
46.4	14.7	36.3	15	58	13.2
28.8		45.8		53.2
41.7		54.4		52.5
33.8		53.6		27.3
22.1		32.6		30.3
38.7		18		16
19		27		17.6
26.7		28.6		0
56.1		45.8		50
0		34.5		36.8
31.7		52.4		48.4
32.8		43.9
