# Supplementary material for: A delayed fractionated dose RTS,S AS01 vaccine regimen mediates protection via improved T follicular helper and B cell responses
Source: eLife. 2020 Apr 29;9:e51889. doi: 10.7554/eLife.51889 (PMC7213985; doi:10.7554/eLife.51889)
Supplement: Figure 4—source data 5. [file elife-51889-fig4-data5.xlsx]

## Sheet: Fig 4C
Fig 4 source data file 5:Fig 4C: PF CSP specific Ki67+ memory B cells: DFD vs. STD
DFD: T5	STD: T5	DFD: T6	STD: T6	DFD: T7	STD: T7
12.2	46.5	48.5	38.6	36.5	66.3
68.9	1.06	61.6	2.35	54.4	3.3
50.4	17.6	62.5	17.1	43.6	24.4
0	32	57.1	21.9	33.3	20.4
43.9	13.5	30.3	9.73	42	12.2
36.5	1.19	48.5	12.4	19.2	1.36
81.6	0	75.1	0	77	0
	3.06		2.05		3.23
84.8	3.12	77.6		89.1
25.4	37.1	31.5	34.7	28.6	33.8
20		24.5		13.8
39.6		68.6		67.9
49.5	5.02	45.4	9.32	49.5	24.7
47.2	2.81	75.6	2.67	64.7	4.52
23.9		23.7	50	30.4	75.6
49.6	32	37.3	46.7	51.5	51.8
28.4	38.1	30	74.5		44.7
27.8		47.7	0.847	32.3	1.02
34		19.9		23.5
51.6		73.2		75.3
29		50.1		52.8
48.8		49.2		45.5
60.1		53.7		46.6
16.8		29.9		35
34.8		15		45.2
28
65.3		65.4		65.2
23.5		16.8		31.2
26.8		26.7		23.3
27.8		23.3		17.7
