# Supplementary material for: A delayed fractionated dose RTS,S AS01 vaccine regimen mediates protection via improved T follicular helper and B cell responses
Source: eLife. 2020 Apr 29;9:e51889. doi: 10.7554/eLife.51889 (PMC7213985; doi:10.7554/eLife.51889)
Supplement: Figure 4—source data 6. [file elife-51889-fig4-data6.xlsx]

## Sheet: Fig 4F
Fig 4 source data file 6:Fig 4F: PF 16 specific Ki67+ memory B cells: DFD vs. STD
DFD: T5	STD: T5	DFD: T6	STD: T6	DFD: T7	STD: T7
11.2	54.1	47.5	41.2	35.5	63.6
68.4	23	61.1	2.44	53.9	3.23
48	28.5	60.1	19.8	41.2	27.7
	17.2	58.9	23.2	30	23.4
38.9	21.1	51.7	31.6	50	17.1
38.2	5.27	54.9	0.727	32.1	0.938
76.6		75.8		84.3	0
	1.87		2.79		2.45
87.6		84.1		89.6
33.5	33	28.3	51	34.7	34.2
28.5		30.1		4.39
67.1		75.7		81
39	23.3	46.5	30.3	36	16.3
57.6	4.38	75	6.14	71.8	1.63
22.9		16.7	44.8	30.1	89.4
48.8	61.9	38.6	41	49.9	56.7
28	73.6	29.6	79.6		64.9
38.3	2.16	49	0.529	35.2	1.24
41		23.1		46.6
52.6		73.9		82.9
48.5		66.4		58.7
51.2		55.5		55.8
62.2		64.6		39.6
28.5		41.5		15.2
21.3		0		25.4
27.7
52.5		54.7		59.7
50		22.3		33.6
27.7		30.2		24.5
35.8		20.6		16.3
