# Supplementary material for: A delayed fractionated dose RTS,S AS01 vaccine regimen mediates protection via improved T follicular helper and B cell responses
Source: eLife. 2020 Apr 29;9:e51889. doi: 10.7554/eLife.51889 (PMC7213985; doi:10.7554/eLife.51889)
Supplement: Figure 5—figure supplement 1—source data 1. — (A) PF-16-specific IgG (ng/ml). (B) PF-16-specific IgG compared between DFD and STD (ng/ml). (C) PF-CSP-specific IgG (ng/ml). (D) PF-CSP-specific IgG compared between DFD and STD (ng/ml). (E) R32LR-specific IgG (ng/ml). (F) R32LR-specific IgG compared between DFD and STD (ng/ml). [file elife-51889-fig5-figsupp1-data1.xlsx]

## Sheet: Fig A
Fig A: PF-16 specific IgG (ng/ml)
	P		NP
	Mean	SEM	Mean	SEM
T0	25.66	2.589	25.83	5.82
T2	27.88	3.165	28.48	6.97
T4	59.78	9.265	46.31	14.24
T5	45.95	5.738	28.48	6.78
T6	49.84	6.232	47.58	13.48
T7	50.39	6.803	29.8	9.233

## Sheet: Fig B
Fig B: PF-16 specific IgG between DFD vs. STD (ng/ml)
DFD: T5	STD: T5	DFD: T6	STD: T6	DFD: T7	STD: T7
29.694	62.481	71.847	40.167	84.607	36.248
21.049	31.359	68.713	53.872	64.511	22.494
27.466	50.011	23.328	44.729	44.995	37.011
24.554	25.18	28.835	21.77	26.129	10.252
17.813	33.291	13.316	88.808	32.671	33.202
16.198	19.194	84.691	7.368	12.789	10.784
98.513	41.514	113.655	94.449	64.339	90.036
39.335	17.711	29.34	7.341	139.886	5.644
116.762	0	53.56	14.775	88.462	20.247
113.623	18.7	162.415	26.617	161.801	24.248
88.373		38.533		31.267
26.488		21.117		140.221
59.501		78.35		19.059
16.561		50.117		32.142
43.326		19.539		33.863
60.561		62.644		54.645
157.299		54.783
29.163		39.335		26.59
69.878		35.527		101.555
20.546		35.904		57.285
47.665		61.937		99.027
76.088		135.781		68.453
22.83		13.873		20.156
62.385		47.212		21.787
13.04		0		10.065
55.918				37.048
43.454	43.319	29.415	107.072	32.209	53.7
12.652	2.643	17.319	0	18.478	0
57.334	0	65.12	33.438	96.881	7.266
10.987	26.935	46.524	48.488	19.331	38.03
	57.093		128.438		32.098

## Sheet: Fig C 
Fig C: PF-CSP specific IgG (ng/ml)
	P		NP
	Mean	SEM	Mean	SEM
T0	25.41	2.222	24.64	5.012
T2	29.75	3.046	36.91	12.33
T4	42.83	6.363	58.9	18.58
T5	35.97	3.6	21.24	5.112
T6	37.18	5.637	28.9	6.65
T7	40.38	5.185	29.78	9.018

## Sheet: Fig D
Fig D: PF-CSP specific IgG between DFD vs. STD (ng/ml)
DFD: T5	STD: T5	DFD: T6	STD: T6	DFD: T7	STD: T7
33.778	27.659	55.441	61.961	83.945	49.486
30.87	21.054	85.592	51.949	63.266	27.48
27.349	22.289	15.58	21.482	53.826	24.355
24.896	28.72	21.808	38.879	29.13	12.941
13.775	8.312	13.18	14.482	42.992	22.762
12.547	44.037	20.491	7.324	8.137	7.763
71.842	65.649	56.527	147.001	61.816	126.375
18.488	22.557	25.568	8.441	70.712	9.087
46.275	78.797	35.027	15.877	64.783	8.561
52.362	30.939	137.447	15.709	135.923	27.629
42.553		0		0
10.474		17.064		46.05
32.431		39.876		13.198
19.202		20.225		38.229
39.772		22.316		36.581
41.662		39.027		36.796
90.185		29.166
32.169		50.167		27.494
95.093		26.708		56.063
24.699		27.396		37.188
26.302		72.674		59.301
39.469		64.438		41.141
28.5		14.992		19.669
27.816		27.395		17.931
9.629		0		12.36
52.771				40.461
51.057	43.319	22.573	22.211	60.062	24.895
10.019	2.643	15.42	0	17.172	0
41.025	0	47.592	40.145	90.754	8.183
8.097	26.935	36.613	37.789	19.598	39.763

## Sheet: Fig E
Fig E: R32LR specific IgG (ng/ml)
	P		NP
	Mean	SEM	Mean	SEM
T0	27.6	2.883	25.7	5.504
T2	27.48	2.835	28.75	5.706
T4	26.85	4.208	30.1	8.516
T5	29.24	3.077	21.92	4.794
T6	21.4	2.469	24.74	3.955
T7	30.88	3.426	24.68	8.372

## Sheet: Fig F
Fig F: R32LR specific IgG between DFD vs. STD (ng/ml)
DFD: T5	STD: T5	DFD: T6	STD: T6	DFD: T7	STD: T7
29.54	49.296	37.297	13.145	66.427	26.104
35.295	20.935	67.442	48.504	77.019	28.598
35.783	23.095	21.012	29.305	64.208	32.08
23.358	27.696	23.015	19.318	17.952	12.054
13.085	4.297	10.747	6.492	30.095	15.777
15.479	28.328	12.831	7.587	13.474	8.588
27.891	23.16	30.231	33.657	28.371	32.004
17.343	21.998		7.399	60.444	11.09
26.093	45.661	14.837	11.873	34.586	9.522
51.303	26.166	38.826	10.698	71.455	24.302
34.08		0		0
5.861		0		25.046
15.631		23.466		11.133
14.597		12.137		31.992
31.189		20.384		25.499
		29.586		32.77
91.916		21.397
38.545		39.232		40.611
72.364		16.409		36.983
20.546		22.028		29.821
45.521		33.364		73.526
16.394		16.455		26.583
23.881		15.9		14.086
7.754		29.881		12.617
10.686		3.224		13.153
48.508				42.806
44.706	19.304	20.564	31.474	30.474	28.617
12.352	11.474	20.64	0	20.687	2.461
41.2	0	31.279	47.991	32.838	3.316
8.124	20.147	29.985	22.505	21.198	20.147
