# Supplementary material for: A delayed fractionated dose RTS,S AS01 vaccine regimen mediates protection via improved T follicular helper and B cell responses
Source: eLife. 2020 Apr 29;9:e51889. doi: 10.7554/eLife.51889 (PMC7213985; doi:10.7554/eLife.51889)
Supplement: Figure 5—source data 1. [file elife-51889-fig5-data1.xlsx]

## Sheet: Fig 5 A
Fig 5 source data file 1: Fig 5A: Spontaneous ASC/million PBMC: PFCSP
	P		NP
	Mean	SEM	Mean	SEM
T0	0.5008	0.2235	7.17	6.623
T1	19.78	6.697	10.73	5.376
T3	59.77	11.34	17.74	5.156
T5	12.99	2.672	17.27	6.939
