# Supplementary material for: A delayed fractionated dose RTS,S AS01 vaccine regimen mediates protection via improved T follicular helper and B cell responses
Source: eLife. 2020 Apr 29;9:e51889. doi: 10.7554/eLife.51889 (PMC7213985; doi:10.7554/eLife.51889)
Supplement: Figure 5—source data 2. [file elife-51889-fig5-data2.xlsx]

## Sheet: Fig 5 B
Fig 5 source data file 2:Fig 5B: Spontaneous ASC/million PBMC: R32LR
	P		NP
	Mean	SEM	Mean	SEM
T0	0.2039	0.09792	0.2039	0.09792
T1	4.009	2.627	4.009	2.627
T3	10.01	1.708	10.01	1.708
T5	1.963	0.4809	1.963	0.4809
