# Supplementary material for: A delayed fractionated dose RTS,S AS01 vaccine regimen mediates protection via improved T follicular helper and B cell responses
Source: eLife. 2020 Apr 29;9:e51889. doi: 10.7554/eLife.51889 (PMC7213985; doi:10.7554/eLife.51889)
Supplement: Figure 5—source data 3. [file elife-51889-fig5-data3.xlsx]

## Sheet: Fig 5 C
Fig 5 source data file 3:Fig 5C: Memory B cell ELISPOT: PFCSP
	DFD P		DFD+STD NP		Medium P		Medium NP
	Mean	SEM	Mean	SEM	Mean	SEM	Mean	SEM
T0	215.6	33.12	234.9	101.5	149.8	32.1	88.6	32.07
T2	876.3	165	258.6	107.6	257.6	55.1	130.3	46.84
T4	1582	351.2	380.1	113.4	251	60.01	145	50.78
T5	695.4	133.7	185.7	70.08	234.8	35.75	143.1	49.18
T6	1252	306.1	280.1	60.56	184.9	30.4	141.3	39.02
T7	1317	279.9	183.1	44.37	235.3	29.49	198.3	80.27
