# Supplementary material for: A delayed fractionated dose RTS,S AS01 vaccine regimen mediates protection via improved T follicular helper and B cell responses
Source: eLife. 2020 Apr 29;9:e51889. doi: 10.7554/eLife.51889 (PMC7213985; doi:10.7554/eLife.51889)
Supplement: Figure 5—source data 4. [file elife-51889-fig5-data4.xlsx]

## Sheet: Fig 5 D
Fig 5 source data file 4:Fig 5D: Memory B cell ELISPOT: PF16
	DFD P		DFD+STD NP		Medium P		Medium NP
	Mean	SEM	Mean	SEM	Mean	SEM	Mean	SEM
T0	704.3	369.6	263.1	175	149.8	32.1	88.6	32.07
T2	2507	1632	547.4	290.1	257.6	55.1	130.3	46.84
T4	5086	2956	492.3	157.3	251	60.01	145	50.78
T5	4868	2129	564.7	331.6	234.8	35.75	143.1	49.18
T6	5285	2423	884.7	406	184.9	30.4	141.3	39.02
T7	2667	858.6	658.4	362.3	235.3	29.49	198.3	80.27
