# Supplementary material for: A delayed fractionated dose RTS,S AS01 vaccine regimen mediates protection via improved T follicular helper and B cell responses
Source: eLife. 2020 Apr 29;9:e51889. doi: 10.7554/eLife.51889 (PMC7213985; doi:10.7554/eLife.51889)
Supplement: Figure 5—source data 5. [file elife-51889-fig5-data5.xlsx]

## Sheet: Fig 5 E
Fig 5 source data file 5:Fig 5E: Memory B cell ELISPOT: R32LR
	DFD P		DFD+STD NP		Medium P		Medium NP
	Mean	SEM	Mean	SEM	Mean	SEM	Mean	SEM
T0	149.3	25.24	144.6	36.85	149.8	32.1	88.6	32.07
T2	685.9	168.3	236.7	88.62	257.6	55.1	130.3	46.84
T4	725.1	178.5	346.6	126.1	251	60.01	145	50.78
T5	549.7	149.4	155.9	69.91	234.8	35.75	143.1	49.18
T6	457.2	131.1	304.9	130	184.9	30.4	141.3	39.02
T7	954.7	388.4	122	24.31	235.3	29.49	198.3	80.27
