# Supplementary material for: A delayed fractionated dose RTS,S AS01 vaccine regimen mediates protection via improved T follicular helper and B cell responses
Source: eLife. 2020 Apr 29;9:e51889. doi: 10.7554/eLife.51889 (PMC7213985; doi:10.7554/eLife.51889)
Supplement: Figure 5—source data 6. [file elife-51889-fig5-data6.xlsx]

## Sheet: Fig 5 F
Fig 5 source data file 6:Fig 5F: PF-CSP specific Memory B cell ELISPOT: DFD vs. STD
DFD: T5	STD: T5	DFD: T6	STD: T6	DFD: T7	STD: T7
67	216.67	457	0	2013	53.33
210	1620	153	4960	357	6436.67
250	300	97	360	1147	1523.33
0	0	263.3	0	273.3	673.33
157	133.3	163	1063.3	743	130
903	406.7	483.3	1433.3	46.7	1756.7
100	2703	2443	5677	4270	837
1143.3	1670	143	4200	2360	4576.67
887	47	133.3	177	1463.3	73
620	650	6517	670	5883	327
93	316	613.33	100	270	166.67
3310		287		1100
1113.33		5563.33		2300
947	27	920	540	463.33	77
710	623	253	560	423	230
1047	20	453	20	810	6.67
217	23.3	987	246.7	110	213.3
1020	36.7	390	46.7	960	16.7
16.7	330	333.3	447	1096.7	297
133.3		923.3		516.7
133.3		946.7		130
2190		1063.3		976.67
663		516.67		313
347		1550		257
		20
507		287		410
113.3		166.7		336.7
113.3		150		186.7
63		337		57
