# Supplementary material for: A delayed fractionated dose RTS,S AS01 vaccine regimen mediates protection via improved T follicular helper and B cell responses
Source: eLife. 2020 Apr 29;9:e51889. doi: 10.7554/eLife.51889 (PMC7213985; doi:10.7554/eLife.51889)
Supplement: Figure 5—source data 7. [file elife-51889-fig5-data7.xlsx]

## Sheet: Fig 5 G
Fig 5 source data file 7: Fig 5G: PF-16 specific Memory B cell ELISPOT: DFD vs. STD
DFD: T5	STD: T5	DFD: T6	STD: T6	DFD: T7	STD: T7
320	646.67	1047	0	2043	370
1023	5570	347	3436.67	130	2520
750	743.33	220	1080	837	716.67
373.3	0	1986.7	0	760	890
287	1223.3	210	3443.3	540	70
563.3	2013.3	2070	2700	1793.3	1526.7
5767	977	6137	1027	6697	343
1033	640	603	4183.33	6203	2113.33
2826.7	17	566.7	87	1440	30
8490	2627	8133	2483	2643	773
1236	230	1793.33	323	2180	283.33
680		673		3197
6956.67		6933.33		2396.67
203	853	1180	800	586.67	720
1293	867	93	1093	327	947
	83.33		33.33		16.67
6003	36.7	4047	823.3	123	223.3
180	50	510	43.3	5006.7	10
4950	90	600	207	2606.7	230
13.3		960		850
406.7		560		193.33
4070		6476.67		833.33
1143.33		570		15667
				167
423		27
3400		4400		3800
70		323.3		370
150		626.7		220
47		497		47
