# Supplementary material for: A delayed fractionated dose RTS,S AS01 vaccine regimen mediates protection via improved T follicular helper and B cell responses
Source: eLife. 2020 Apr 29;9:e51889. doi: 10.7554/eLife.51889 (PMC7213985; doi:10.7554/eLife.51889)
Supplement: Figure 5—source data 8. [file elife-51889-fig5-data8.xlsx]

## Sheet: Fig 5 H
Fig 5 source data file 8:Fig 5H: R32LR specific Memory B cell ELISPOT: DFD vs. STD
DFD: T5	STD: T5	DFD: T6	STD: T6	DFD: T7	STD: T7
283	243.33	243	0	457	83.33
1090	486.67	1313	163.33	1410	1146.67
770	170	197	280	760	483.33
33.3	0	143.3	0	76.7	516.67
27	103.3	53	20	247	26.7
36.7	13.3	500	23.3	160	23.3
1943	1233	383	417	810	213
733	110	0	370	11533	283.33
346.7	83	63.3	80	83.3	40
723	140	2380	113	1180	243
133.33	3280	283.33	3703.33	243.33	7526.67
83		23		223
583.33		1886.67		206.67
246	303	173.33	243	220	110
150	20	167	343	200	113
7	13.33	153	10	273	36.67
740	3.3	247	276.7	357	90
630	43.3	477	20	416.7	13.3
163.3	80	26.7	260	360	103
23.3		203.3		796.7
63.3		130		90
60		96.67		160
500		333.33		303
47		790		1467
		1067
103		107		187
113.3		160		203.3
146.7		196.7		96.7
733		1433		267
